# Supplementary material for: Supersonic microwave co-assistance (SMC) efficient synthesis of red luminescent Eu3+ activated silver molybdates and their phase-dependent evolution processes
Source: Royal Society of Chemistry journal article supplement (doi:10.1039/c3ce40553b), 2013-01-01
Supplement: c3ce40553b.pdf [file c3ce40553b.pdf]

***Supporting information for***

Supersonic microwave co-assistance (SMC) efficient synthesis of red luminescent Eu<sup>3+</sup> activated silver molybdates and their phase-dependent evolution processes

Jintai Lin<sup>a</sup>, Qianming Wang<sup>a, b, c\*</sup>, Yuhui Zheng<sup>a</sup>, Yanfen Zhang<sup>a</sup>

*a. School of Chemistry & Environment, South China Normal University, Guangzhou 510006, China*

*b. Key Laboratory of Theoretical Chemistry of Environment, Ministry of Education, School of Chemistry & Environment, South China Normal University, Guangzhou 510006, China*

*c. Guangdong Technology Research Center for Ecological Management and Remediation of Urban Water System, Guangzhou, China, 510006*

\* To whom the correspondence should be addressed. E-mail: [qmwang@scnu.edu.cn](mailto:qmwang@scnu.edu.cn)

Tel: 86-20-39310258; Fax: 86-20-39310187

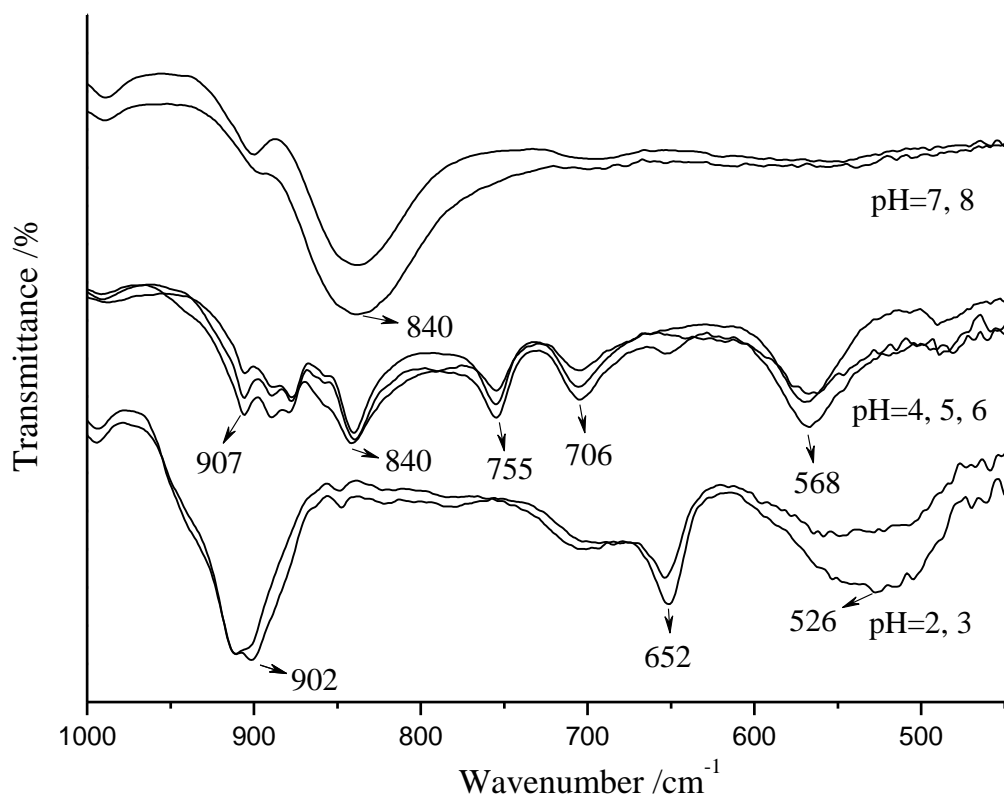

Figure S1. FI-IR spectra of the products synthesized at the condition of different pH values (2-8).
